# Supplementary material
Source: Springer Nature journal article supplement (https://www.springermedizin.de/resource/supplementary/13034_2007_34_MOESM2_ESM.pdf/9652176)
Supplement: MOESM2 [file 9652176]

Potentially relevant bibliographic records or citations identified and screened for possible retrieval (n=6,341)

Bibliographic records or citations excluded via first relevance assessment, with reason (n=6,147): not a school-based intervention to influence stigma for individuals 18 years of age or younger

Reports retrieved for more in-depth assessment of relevance (n=170)

Reports excluded via second relevance assessment, with reasons (n=90):

- not an intervention intended to eliminate or prevent stigma (n=41)
- not a school-based implementation (n=13)
- not a population of individuals 18 years of age or younger (n=2)
- no evaluation of possible benefits or harm (n=14)
- not a report describing "primary study" evidence (n=20)

Reports excluded via level 3 relevance assessment, with reason (n=37): data not reported separately for those 18 years of age or younger

Other reports not proceeding, with reason (n=24): report not retrieved

Reports (n=43), which describe evaluation studies (n=40) that were entered into Evidence Synthesis
